# Supplementary material for: Phosphorylation promotes the endonuclease-like activity of human centrin 2
Source: Royal Society of Chemistry journal article supplement (doi:10.1039/d2ra03402f), 2022-01-01

## Supporting information

### Phosphorylation promotes the endonuclease-like activity of human centrin 2

Jing Yang, Yaqin Zhao, Binsheng Yang\*

*Institute of Molecular Science, Key Laboratory of Chemical Biology and Molecular Engineering of Ministry of  
Education, Shanxi University, Taiyuan 030006, China*

\*To whom correspondence should be addressed. Tel: +86 351 7016358. Fax: +86 351 7016358. E-mail: yangbs@sxu.edu.cn

**Fig.S1** Tb<sup>3+</sup>-sensitized fluorescence spectra of HsCen2p with increasing concentration of Tb<sup>3+</sup> in 10 mM Hepes at pH 7.4.

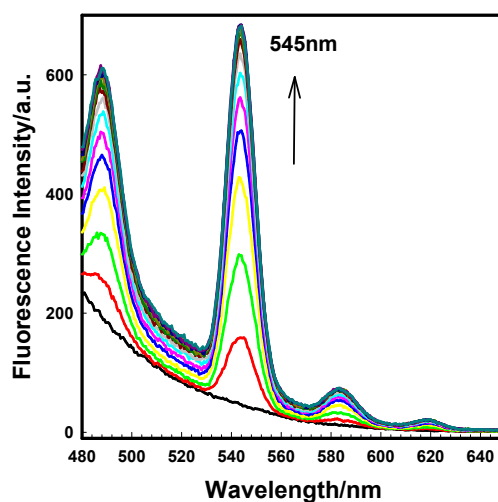

**Fig.S2** (A) Resonance light scattering (RLS) spectra of HsCen2p with increasing  $Tb^{3+}$  in 10 mM Hepes at pH 7.4. (B) The best fits of  $\log[F_i - F_0]/[F_\infty - F_i]$  with  $\log[Tb^{3+}]_f$  for HsCen2 (a) and HsCen2p (b), respectively.

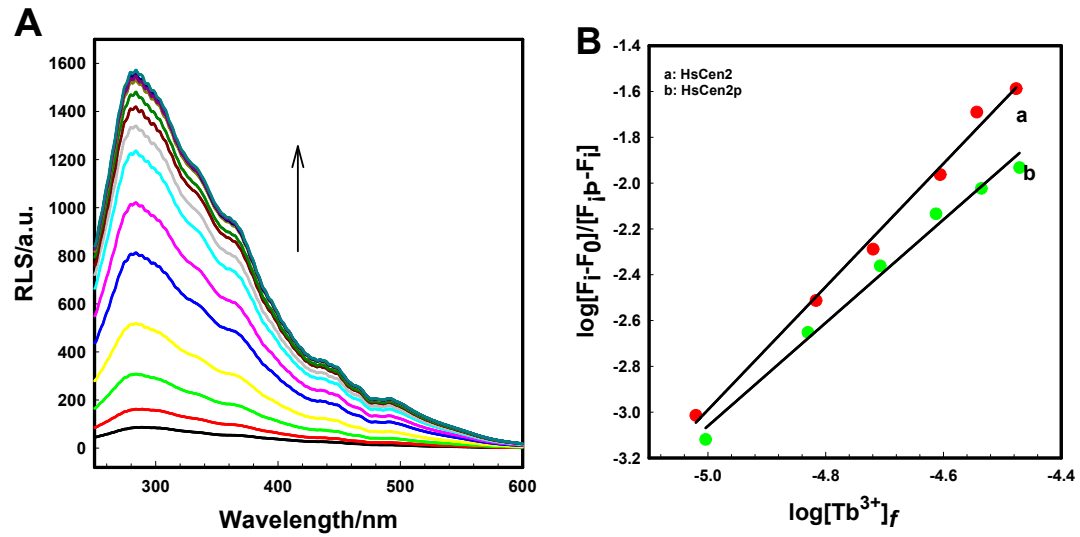

**Fig.S3** Fluorescence spectra of Tb<sub>2</sub>-HsCen2 (A) or Tb<sub>2</sub>-HsCen2p (B) with increasing concentration of Tb<sup>3+</sup> in 10 mM Hepes at pH 7.4. Inset, the titrating curves of Tb<sub>2</sub>-HsCen2 or Tb<sub>2</sub>-HsCen2p at 306 nm against [DNA]/[protein].

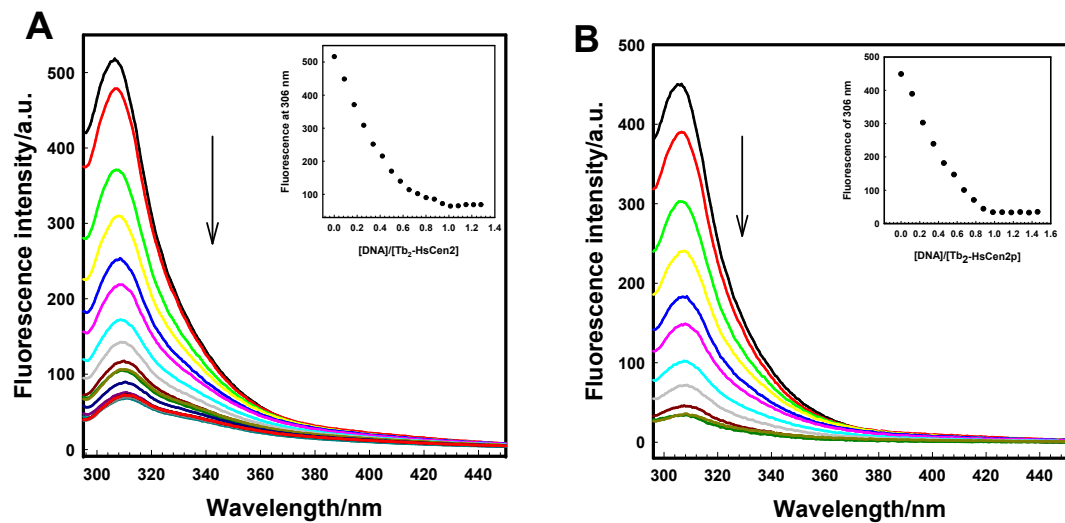

Supplement: d2ra03402f1.pdf [file d2ra03402f1.pdf]
